# Supplementary material for: Picoliter Well Array Chip-Based Digital Recombinase Polymerase Amplification for Absolute Quantification of Nucleic Acids
Source: PubMed Central journal article supplement (PMC4830604; doi:10.1371/journal.pone.0153359), 2016-04-13
Supplement: pone.0153359.s004.pdf [file pone.0153359.s004.pdf]

## S1 File. The Poisson statistical analysis of dRPA results.

The Poisson equation:

$$p = (\lambda^k \cdot e^{-\lambda}) / k! \quad k=0, 1, 2, 3, \dots$$

where  $p$  is the probability of having  $k$  templates in a well given  $\lambda$ .  $\lambda$  is the average number of DNA templates per well. In the digital reaction, when the template number  $k > 0$ , the amplification reaction in the well will proceed, and its fluorescence intensity will increase, which is regarded as “positive” well; when the template number  $k = 0$ , there is no amplification reaction in the well, and its fluorescence intensity will not increase, which is regarded as “negative” well.

The equation simplifies to  $\lambda = -\ln(1 - p)$  when  $k > 0$ . We can get the “measured” number of copies per well (cpw)  $\lambda_m$  by using poisson statistics, where  $p = f/n$ .  $f$  is the number of positive wells, detected by the optical setup through analyzing the increasing fluorescence intensity.  $n$  is the total number of wells on the chip.

The “expected” number of cpw is  $\lambda_e = c_0 \cdot \nu \cdot x_{dil}$ , and  $c_0$  is the stock concentration of DNA templates,  $\nu$  is the volume of each chamber, and  $x_{dil}$  is the dilution factor. Therefore, we can assess the performance of dRPA method by comparing the correlation between the “measured” cpw and the “expected” cpw.
